# Supplementary material
Source: PubMed Central journal article supplement (PMC2676908)
Supplement: NIHMS103603-supplement-supplement_1.pdf [file NIHMS103603-supplement-supplement_1.pdf]

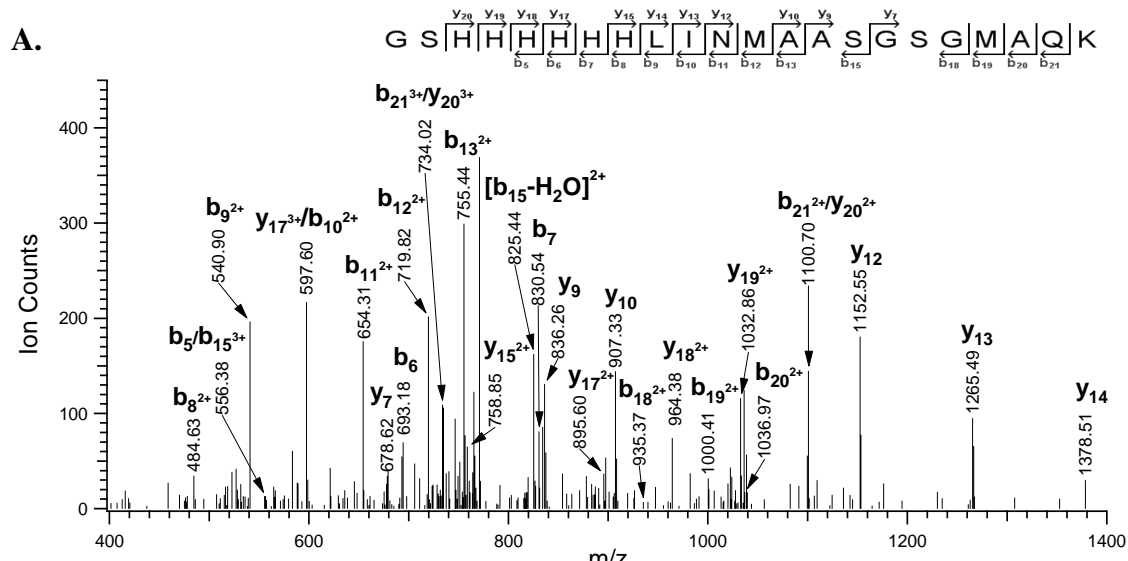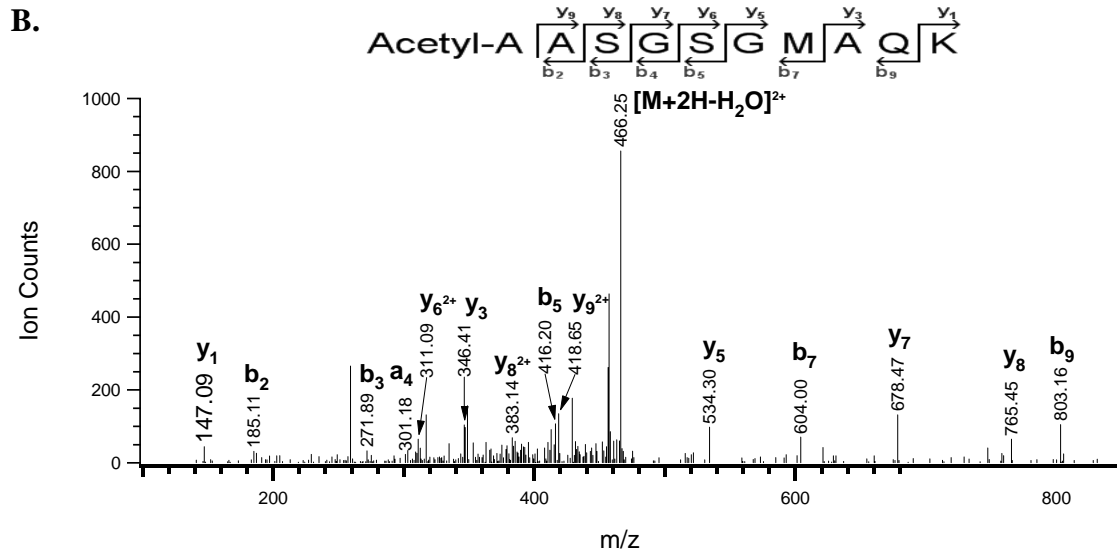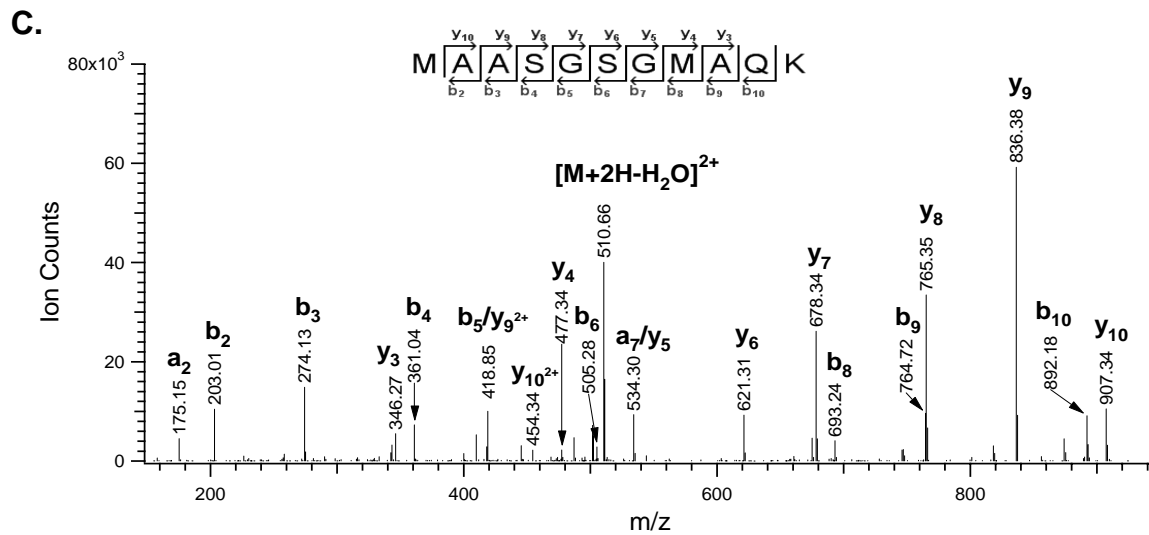

Supplemental Figure 1

Supplemental Figure 2: MS/MS Spectra of the Identified N-terminal Peptides in Table 2.

A. N-terminal Peptide of Subunit CSN1 (MH<sub>3</sub><sup>3+</sup> 1460.6798, LTQ MS/MS)

**M(Met-loss)QIDVDPQEDPQNAPDVNYVVENPSLDLEQYAASYSGLMR<sup>+3</sup>**

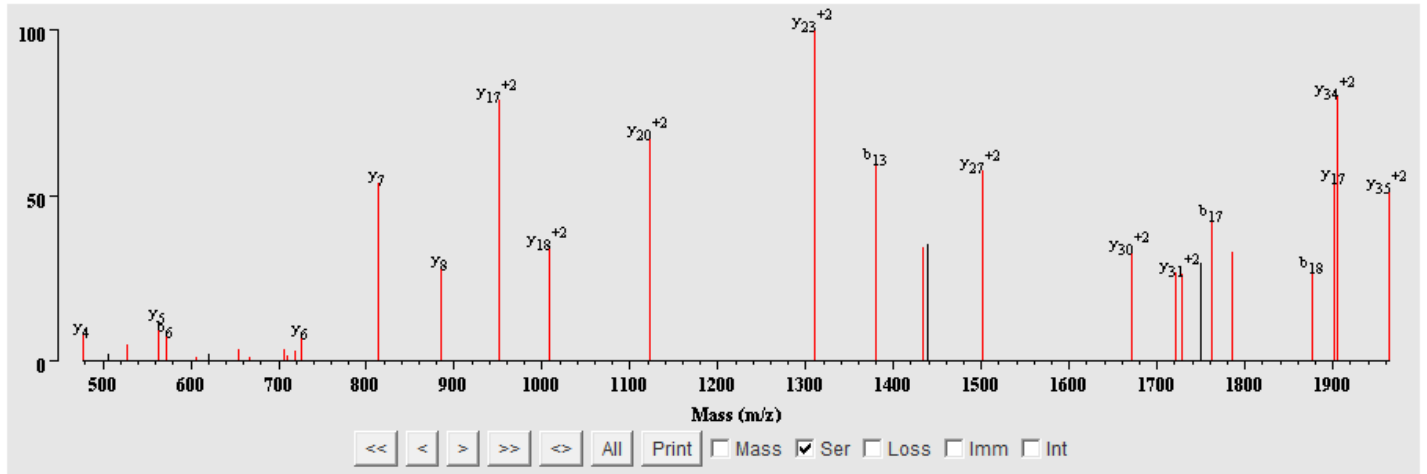

| m/z     | Ion Type                | m/z     | Ion Type                          | m/z     | Ion Type                             |
|---------|-------------------------|---------|-----------------------------------|---------|--------------------------------------|
| 476.602 | NYVV                    | 884.612 | QNAPDVNY-H <sub>2</sub> O         | 1761.73 | QIDVDPQEDPQNAPDV                     |
|         | VNYV                    |         | IDVDPQED-28                       |         | b17                                  |
|         | y4                      |         | y8                                |         | YVVENPSLDLEQYAAS-H <sub>2</sub> O    |
| 527.35  | NPSLD                   |         | YVVENPSL-H <sub>2</sub> O         |         | VVENPSLDLEQYAASY-H <sub>2</sub> O    |
|         | VENPS                   | 950.898 | VVENPSLDL-NH <sub>3</sub>         | 1784.7  | y32-NH <sub>3</sub> +2               |
|         | DVDPQ-28                |         | y17+2                             |         | QEDPQNAPDVNYVVEN-28                  |
| 563.195 | EQYAA                   | 1008.18 | y18+2                             |         | PDVNYVVENPSLDLEQ-28                  |
|         | DVNYV-28                |         | ENPSLDLEQ-H <sub>2</sub> O        | 1875.73 | QIDVDPQEDPQNAPDVN                    |
|         | y5                      | 1122.02 | y20+2                             |         | b18                                  |
| 571.325 | PDVNY-H <sub>2</sub> O  | 1310.54 | y23+2                             |         | NYVVENPSLDLEQYAAS-H <sub>2</sub> O   |
|         | QIDVD                   |         | SLDLEQYAASYS-H <sub>2</sub> O     | 1900.93 | y17                                  |
|         | b6                      |         | PDVNYVVENPSL-NH <sub>3</sub>      | 1905.75 | y34+2                                |
|         | LDLEQ-28                |         | PSLDLEQYAASY-28                   |         | VVENPSLDLEQYAASYSGL-H <sub>2</sub> O |
| 605.518 | PQNAPD-H <sub>2</sub> O | 1379.3  | QIDVDPQEDPQN                      |         | VNYVVENPSLDLEQYAA                    |
|         | DPQAP-H <sub>2</sub> O  |         | b13                               | 1963.22 | y35+2                                |
|         | YVVEN                   | 1433.57 | QIDVDPQEDPQNA-NH <sub>3</sub>     | 1728.21 | QNAPDVNYVVENPSLD-28                  |
|         | LEQYA                   |         | b14-NH <sub>3</sub>               |         | APDVNYVVENPSLDLE-28                  |
|         | NYVVE                   | 1501.47 | y27+2                             |         | y31+2                                |
| 655.245 | EDPQNA                  |         | VDPQEDPQNAPDVN-H <sub>2</sub> O   | 813.419 | EQYAASY                              |
|         | PSLDLE                  |         | a15-H <sub>2</sub> O              |         | YAASYSGL                             |
| 666.37  | DVDPQE-H <sub>2</sub> O |         | NYVVENPSLDLEQ                     |         | y7                                   |
|         | VDPQED-H <sub>2</sub> O |         | VVENPSLDLEQYAA-28                 |         |                                      |
|         | QYAASY-H <sub>2</sub> O | 1671.11 | QEDPQNAPDVNYVVE-28                |         |                                      |
| 705.593 | PQNAPDV-NH <sub>3</sub> |         | y30+2                             |         |                                      |
| 709.12  | y6-NH <sub>3</sub>      | 1720.26 | IDVDPQEDPQNAPDVN-28               |         |                                      |
| 719.33  | NYVVEN                  |         | y31-NH <sub>3</sub> +2            |         |                                      |
| 726.452 | y6                      |         | PQNAPDVNYVVENPSL-H <sub>2</sub> O |         |                                      |

B. N-terminal Peptide of Subunit CSN4 (MH<sub>3</sub><sup>3+</sup> 681.3410, LTQ MS/MS)

**M(Met-loss+Acetyl)AAAVRQDLAQLM(Oxidation)NSSGSHK<sup>+3</sup>**

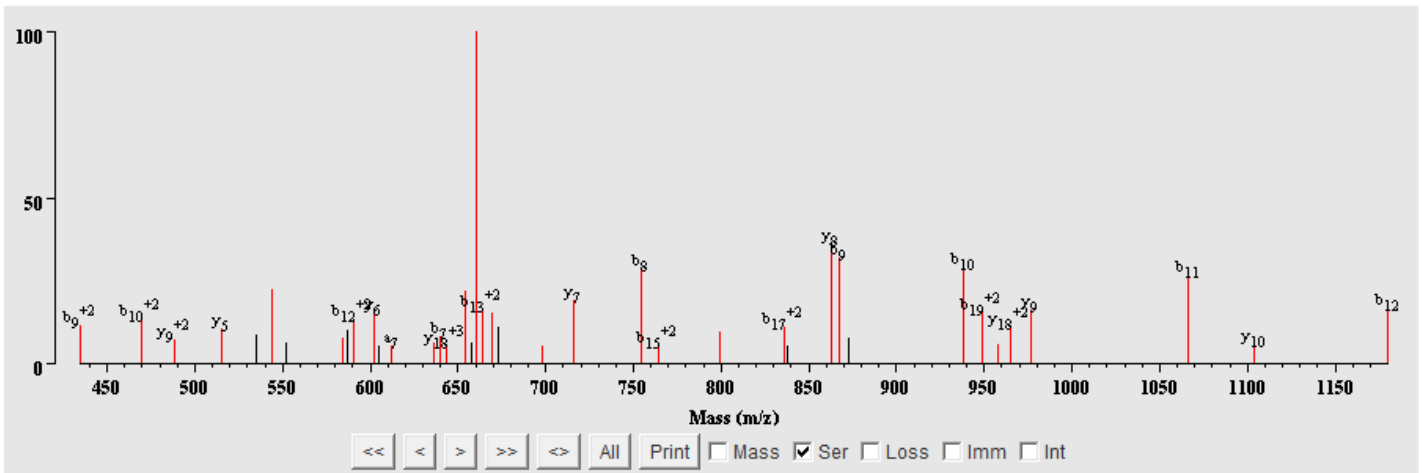

| m/z     | Ion Type    | m/z      | Ion Type |
|---------|-------------|----------|----------|
| 434.263 | b9+2        | 863.234  | y8       |
| 469.742 | b10+2       | 867.309  | b9       |
| 488.682 | y9+2        | 938.275  | b10      |
| 515.32  | y5          | 948.48   | b19+2    |
| 543.991 | y10-H2O+2   | 957.872  | y9-H2O   |
|         | y10-NH3+2   | 965.185  | y18+2    |
| 584.245 | y6-H2O      | 976.165  | y9       |
| 590.284 | y16-H2O+3   | 1066.323 | b11      |
|         | b12+2       | 1104.146 | y10      |
|         | y16-NH3+3   | 1179.482 | b12      |
| 602.408 | a19-SOCH4+3 |          |          |
|         | y6          |          |          |
| 612.053 | b19-SOCH4+3 |          |          |
|         | a7          |          |          |
|         | y12-SOCH4+2 |          |          |
| 636.13  | y12-H2O+2   |          |          |
|         | y12-NH3+2   |          |          |
| 639.438 | b7          |          |          |
| 643.267 | y18+3       |          |          |
| 654.363 | b13-H2O+2   |          |          |
| 660.024 | MH-SOCH4+3  |          |          |
| 664.032 | b13+2       |          |          |
| 669.545 | y13-SOCH4+2 |          |          |
| 698.251 | y7-H2O      |          |          |
| 716.366 | y7          |          |          |
| 754.303 | b8          |          |          |
| 764.484 | b15+2       |          |          |
| 799.326 | b16-H2O+2   |          |          |
|         | y8-SOCH4    |          |          |
|         | b16-NH3+2   |          |          |
| 835.83  | y15-H2O+2   |          |          |
|         | y15-NH3+2   |          |          |
|         | b17+2       |          |          |

C. N-terminal Peptide of CSN 5 (MH<sub>2</sub><sup>2+</sup> 475.22, QSTAR MS/MS)

**M(Met-loss+Acetyl)AASGSGMAQK<sup>+2</sup>**

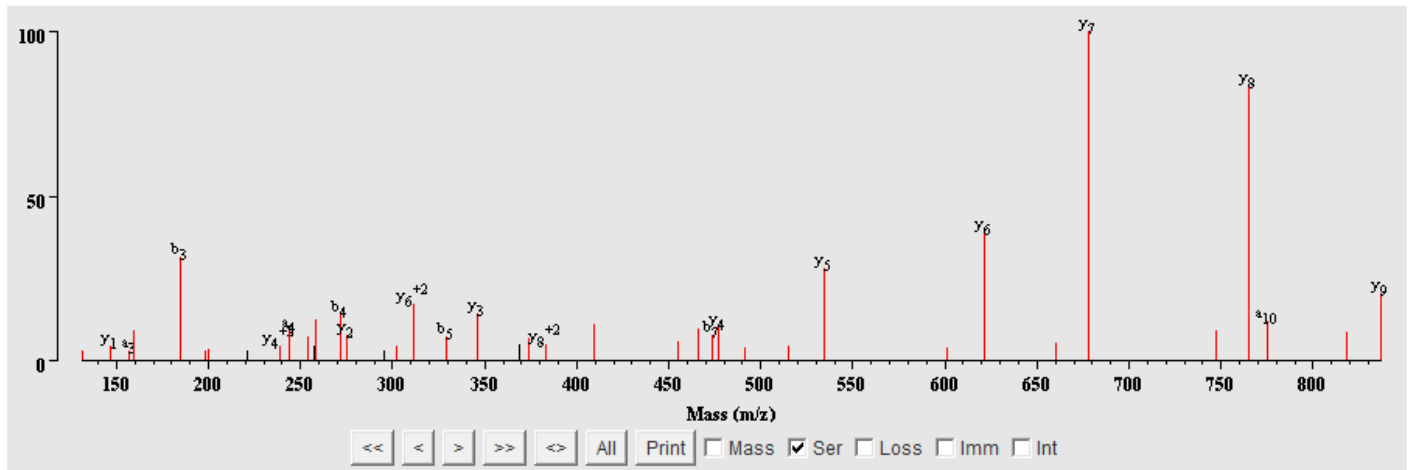

| m/z      | Ion Type   | m/z      | Ion Type    |
|----------|------------|----------|-------------|
| 131.0716 | AS-28      | 534.2647 | ASGSGMA-28  |
| 147.109  | y1         |          | AASGSGM-28  |
| 157.0967 | a3         |          | y5          |
| 159.0691 | AS         | 601.2244 | SGSGMAQ-H2O |
| 185.0829 | b3         | 621.2808 | y6          |
| 198.087  | ASG-H2O    | 660.3011 | y7-H2O      |
| 200.0968 | AQ         | 678.3201 | y7          |
| 239.1042 | y4+2       | 747.3458 | y8-H2O      |
| 244.1178 | a4         | 765.3396 | y8          |
| 254.098  | b4-H2O     | 775.348  | a10         |
| 258.1307 | SGM-H2O    | 818.3866 | y9-H2O      |
|          | y2-NH3     | 836.3979 | y9          |
| 272.1124 | b4         |          |             |
| 275.1584 | ASGS-28    |          |             |
|          | y2         |          |             |
| 302.1439 | y6-H2O+2   |          |             |
| 311.1264 | b5-H2O     |          |             |
| 329.134  | SGMA-H2O   |          |             |
|          | b5         |          |             |
|          | y3-NH3     |          |             |
| 346.1907 | AASGS-28   |          |             |
|          | y3         |          |             |
| 374.1608 | AASGS      |          |             |
|          | y8-H2O+2   |          |             |
| 383.1947 | y8+2       |          |             |
| 409.6824 | y9-H2O+2   |          |             |
| 455.1769 | b7-H2O     |          |             |
| 466.2173 | MH-H2O+2   |          |             |
| 473.1855 | SGSGMA-H2O |          |             |
|          | ASGSGM-H2O |          |             |
|          | b7         |          |             |
| 477.2262 | y4         |          |             |
| 491.1653 | ASGSGM     |          |             |
|          | SGSGMA     |          |             |
| 515.1458 | GSGMAQ-NH3 |          |             |

D. N-terminal Peptide of CSN7a (MH<sub>2</sub><sup>2+</sup> 1073.0811, LTQ MSMS)

**M(Met-loss+Acetyl)SAEVKVTGQNQEQLLLAK<sup>+2</sup>**

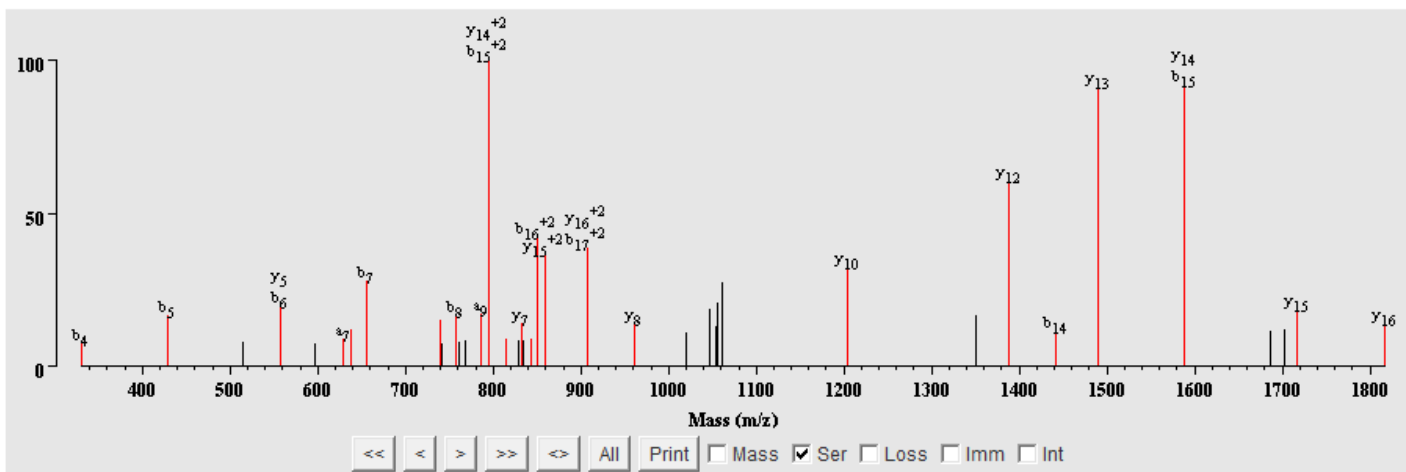

| m/z      | Ion Type  |
|----------|-----------|
| 331.262  | y3        |
| 429.234  | b5        |
| 557.372  | b6        |
|          | y5        |
| 628.31   | a7        |
| 638.446  | b7-H2O    |
| 656.313  | b7        |
| 739.367  | b8-H2O    |
| 786.43   | b15-NH3+2 |
|          | y14-NH3+2 |
|          | a9        |
| 795.082  | b15+2     |
|          | y14+2     |
| 815.488  | y7-NH3    |
| 832.485  | y7        |
| 843.053  | b16-NH3+2 |
| 851.215  | b16+2     |
| 858.971  | y15+2     |
| 908.209  | b17+2     |
| 961.547  | y8        |
| 1203.492 | y10       |
| 1388.753 | y12       |
| 1441.58  | b14       |
| 1489.611 | y13       |
| 1588.796 | b15       |
|          | y14       |
| 1717.026 | y15       |
| 1815.883 | y16       |

E. N-terminal Peptide of Subunit CSN8 (MH<sub>2</sub><sup>2+</sup> 692.3525, LTQ MSMS)

**M(Met-loss)PVAVMAESAFSFK<sup>+2</sup>**

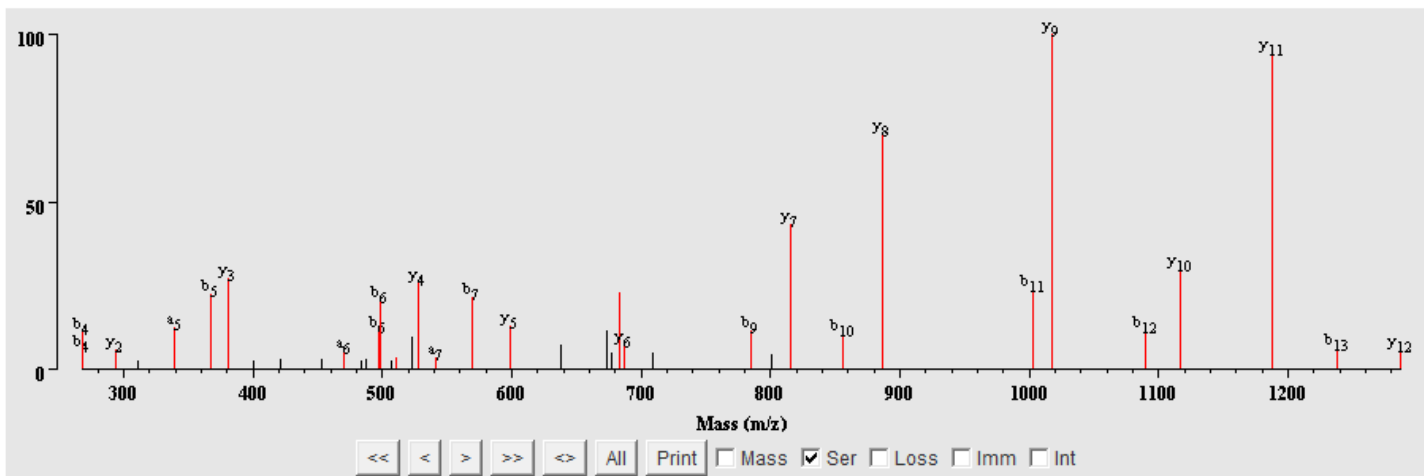

| m/z      | Ion Type  |
|----------|-----------|
| 267.669  | b4        |
| 268.281  | b4        |
| 294.3    | y2        |
| 339.195  | a5        |
| 367.156  | b5        |
| 381.181  | y3        |
| 470.335  | a6        |
| 498.318  | b6        |
| 510.381  | y4-H2O    |
| 528.286  | y4        |
| 540.956  | a7        |
| 569.238  | b7        |
| 599.207  | y5        |
| 683.182  | y13-H2O+2 |
|          | MH-H2O+2  |
|          | y13-NH3+2 |
|          | MH-NH3+2  |
| 686.488  | y6        |
| 785.162  | b9        |
| 815.412  | y7        |
| 856.068  | b10       |
| 886.235  | y8        |
| 1003.298 | b11       |
| 1017.279 | y9        |
| 1090.347 | b12       |
| 1116.256 | y10       |
| 1187.278 | y11       |
| 1238.326 | b13       |
| 1286.263 | y12       |

Supplemental Figure 3. MS/MS Spectra of the Identified Phosphopeptides in Table 3.

A.  $MH_2^{2+}$  820.8492 (LTQ MSMS)

**EGS(Phospho)QGELTPANSQSR<sup>+2</sup>**

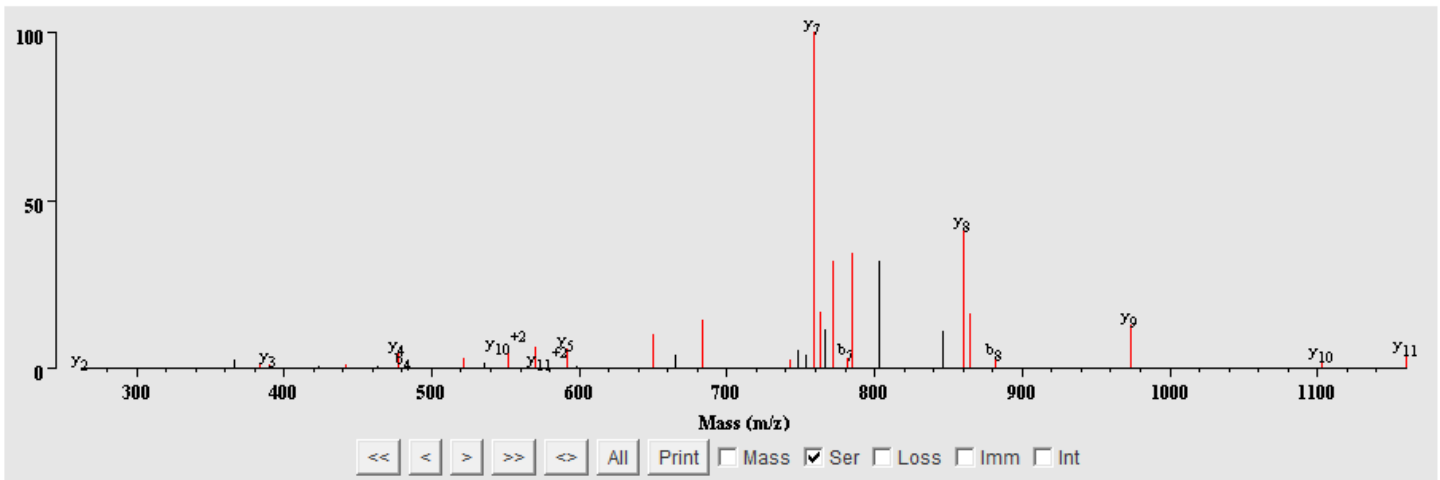

| m/z      | Ion Type   | m/z      | Ion Type |
|----------|------------|----------|----------|
| 262.224  | y2         | 1159.609 | y11      |
| 384.08   | b4-H3PO4   |          |          |
| 390.348  | y3         |          |          |
| 441.293  | b5-H3PO4   |          |          |
| 459.471  | y4-H2O     |          |          |
|          | y4-NH3     |          |          |
| 463.547  | b4-H2O     |          |          |
| 477.368  | y4         |          |          |
| 482.233  | b4         |          |          |
| 521.238  | b5-H2O     |          |          |
| 552.208  | y10+2      |          |          |
| 570.307  | b6-H3PO4   |          |          |
| 580.356  | y11+2      |          |          |
| 591.435  | y5         |          |          |
| 650.159  | b6-H2O     |          |          |
| 683.265  | b7-H3PO4   |          |          |
| 742.471  | y7-NH3     |          |          |
| 748.315  | y14-NH3+2  |          |          |
| 753.883  | a7         |          |          |
| 759.45   | y7         |          |          |
| 763.109  | b7-H2O     |          |          |
| 771.953  | MH-H3PO4+2 |          |          |
| 781.097  | b7         |          |          |
| 784.341  | b8-H3PO4   |          |          |
| 860.472  | y8         |          |          |
| 864.195  | b8-H2O     |          |          |
| 882.259  | b8         |          |          |
| 973.487  | y9         |          |          |
| 1102.648 | y10        |          |          |

B.  $MH_2^{2+}$  860.8324(LTQ MSMS)

### EGSQGELT(Phospho)PANS(Phospho)QSR<sup>+2</sup>

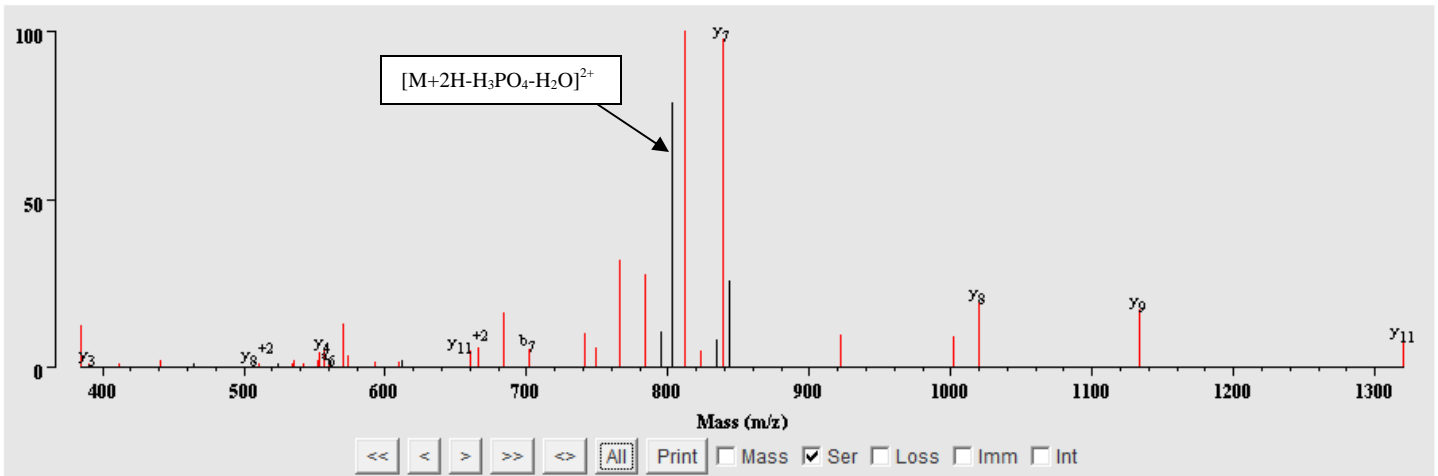

| m/z      | Ion Type       |
|----------|----------------|
| 384.192  | b4-H2O         |
| 390.254  | y3             |
| 411.177  | y7-H2O+2       |
|          | y7-NH3+2       |
| 441.051  | b5-H2O         |
| 511.148  | y8+2           |
| 557.157  | y4             |
| 560.634  | a6             |
| 570.12   | b6-H2O         |
| 573.302  | y5-H3PO4       |
| 660.29   | y11+2          |
| 683.296  | b7-H2O         |
| 701.418  | b7             |
| 741.394  | y7-H3PO4       |
| 784.311  | b8-H3PO4       |
| 802.936  | MH-H3PO4-H2O+2 |
| 811.934  | MH-H3PO4+2     |
| 822.633  | y7-NH3         |
| 839.258  | y7             |
| 922.41   | y8-H3PO4       |
| 1002.381 | y8-H2O         |
| 1020.266 | y8             |
| 1133.395 | y9             |
| 1319.462 | y11            |



C. MH<sub>2</sub><sup>2+</sup> 628.3220 (LTQ MSMS)

### NQIHVKS(Phospho)PPR<sup>+2</sup>

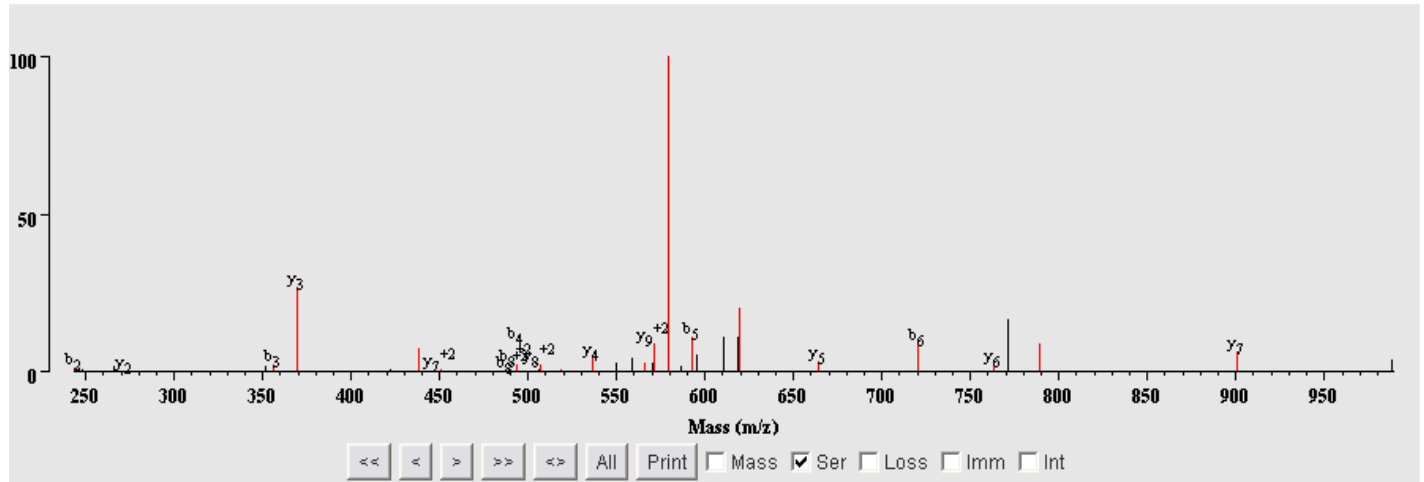

| m/z     | Ion Type   |
|---------|------------|
| 243.174 | b2         |
| 272.362 | y2         |
| 356.139 | b3         |
| 369.265 | y3         |
| 401.822 | y7-H3PO4+2 |
| 438.319 | y4-H3PO4   |
| 450.728 | y7+2       |
| 492.069 | b9-H3PO4+2 |
| 493.325 | b8+2       |
| 493.325 | b8+2       |
| 493.325 | b4         |
| 507.391 | y8+2       |
| 518.404 | y4-NH3     |
| 536.366 | y4         |
| 566.297 | y5-H3PO4   |
| 570.958 | y9+2       |
| 579.393 | MH-H3PO4+2 |
| 592.327 | b5         |
| 619.804 | MH-NH3+2   |
| 664.334 | y5         |
| 720.391 | b6         |
| 763.431 | y6         |
| 789.317 | b7-H3PO4   |
| 900.423 | y7         |

**NQIHVKSPPREGSQGELT(Phospho)PANSQSR<sup>3+</sup>**

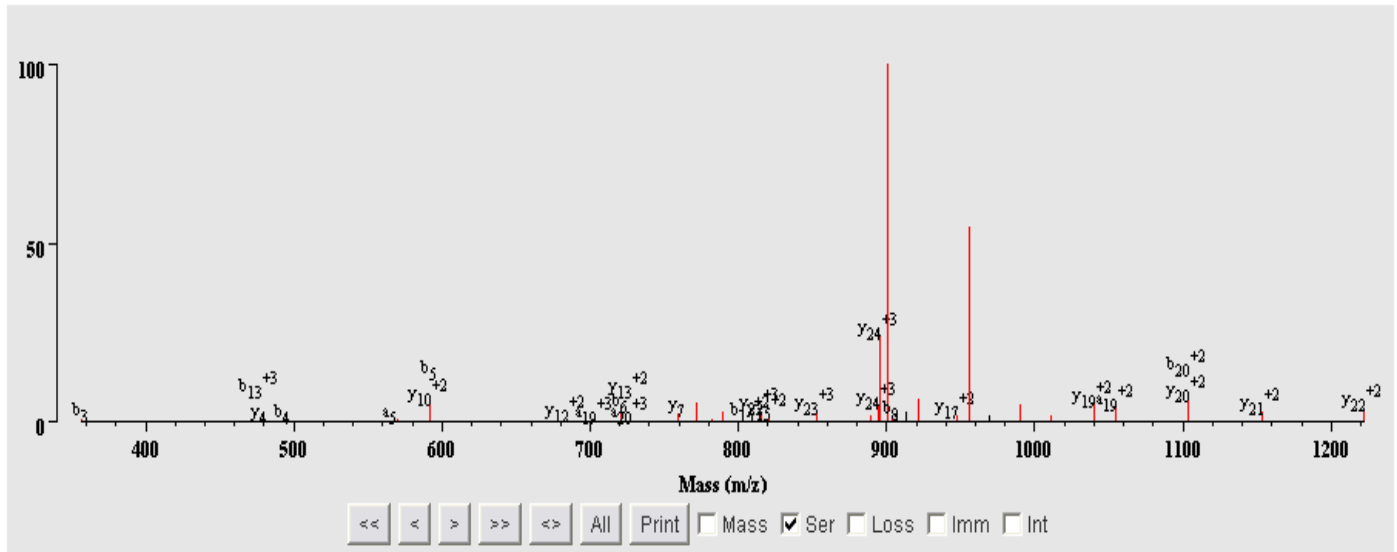

| m/z     | Ion Type    | m/z      | Ion Type    | m/z      | Ion Type    |
|---------|-------------|----------|-------------|----------|-------------|
| 356.253 | b3          | 789.256  | b7-H2O      | 1039.745 | y19+2       |
| 477.353 | y4          | 808.937  | b15+2       | 1054.586 | a19+2       |
|         | b13+3       |          | y22-H2O+3   |          | y20-H3PO4+2 |
| 493.086 | b9-NH3+2    |          | y22-NH3+3   |          | b20-H3PO4+2 |
|         | b4          | 815.147  | y22+3       | 1103.737 | y20+2       |
| 564.46  | a5          | 820.218  | y23-H3PO4+3 |          | b20+2       |
| 570.417 | b10-H2O+2   |          | y15+2       |          | y21-H3PO4+2 |
|         | b10-NH3+2   | 852.65   | y23+3       | 1153.214 | b21-NH3+2   |
| 573.995 | y5-H2O      | 889.294  | y24-H2O+3   |          | y21+2       |
|         | y5-NH3      |          | y24-NH3+3   | 1221.551 | y11-H2O     |
| 592.289 | y10+2       |          | y16-H2O+2   |          | y22+2       |
|         | b5          | 894.439  | y24+3       |          |             |
| 684.197 | y12+2       | 895.115  | y24+3       |          |             |
| 703.525 | a19+3       | 900.217  | MH-H3PO4+3  |          |             |
|         | y20-H3PO4+3 | 900.827  | MH-H3PO4+3  |          |             |
|         | b6-NH3      | 903.973  | b8          |          |             |
|         | b20-H3PO4+3 | 921.674  | b17-NH3+2   |          |             |
| 720.407 | b6          |          | y8-H2O      |          |             |
| 727.269 | a20+3       | 947.133  | y18-H3PO4+2 |          |             |
|         | y13+2       |          | y17+2       |          |             |
| 741.042 | y7-H2O      | 956.239  | y9-H3PO4    |          |             |
|         | b21-H3PO4+3 |          | a18-H3PO4+2 |          |             |
| 745.138 |             | 990.446  | y19-H3PO4+2 |          |             |
| 759.462 | y7          | 1010.948 | b18-H2O+2   |          |             |
| 771.362 | b22-H3PO4+3 |          | b18-NH3+2   |          |             |
|         | b14-H2O+2   |          |             |          |             |
|         | b14-NH3+2   |          |             |          |             |
|         | y15-H3PO4+2 |          |             |          |             |
| 782.042 | y22-H3PO4+3 |          |             |          |             |

**NQIHVKS(Phospho)PPREGSQGELTPANSQSR<sup>+3</sup>**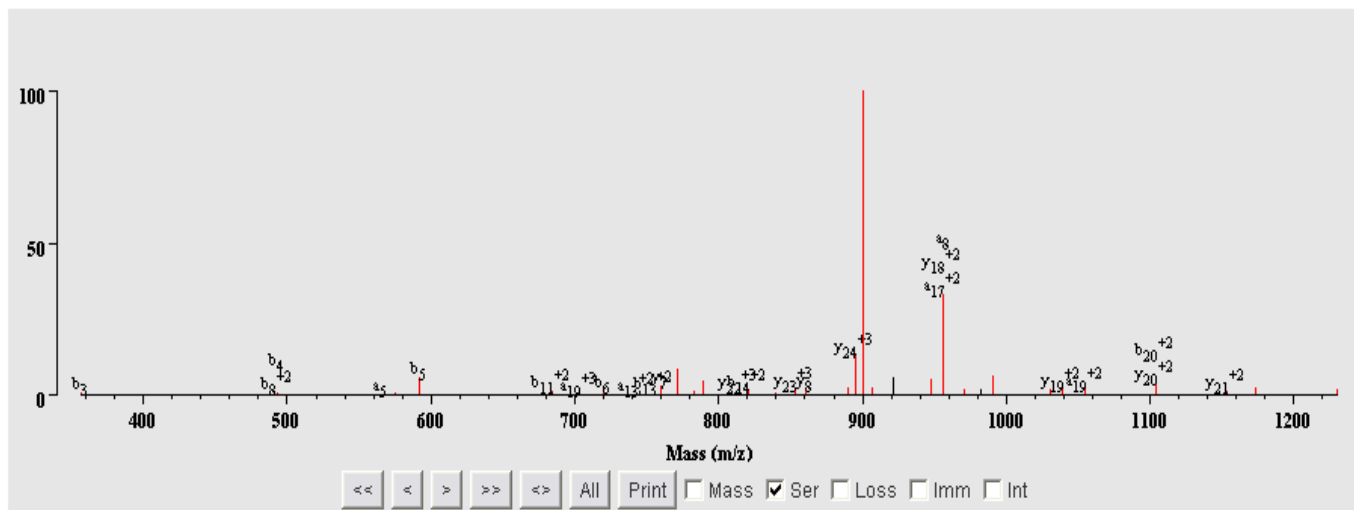

| m/z     | Ion Type    | m/z      | Ion Type    | m/z      | Ion Type    |
|---------|-------------|----------|-------------|----------|-------------|
| 356.239 | b9-NH3+3    |          | b15-NH3+2   | 1039.404 | y19+2       |
|         | b3          |          | b23-H2O+3   | 1054.555 | a19+2       |
| 493.222 | b8+2        | 846.999  | y23-H2O+3   |          | y20-H3PO4+2 |
|         | b4          |          | y23-NH3+3   |          | b20-H3PO4+2 |
| 564.579 | a5          | 852.91   | y23+3       | 1103.929 | y20+2       |
| 575.266 | b5-NH3      | 860.597  | y8          |          | b20+2       |
| 592.25  | b5          | 889.679  | y24-H2O+3   |          | y21-H3PO4+2 |
| 684.096 | b11+2       |          | y24-NH3+3   | 1153.192 | b21-NH3+2   |
| 703.486 | b12-H2O+2   | 894.792  | y24+3       |          | y21+2       |
|         | a19+3       | 900.169  | MH-H3PO4+3  | 1172.926 | y22-H3PO4+2 |
|         | y20-H3PO4+3 | 900.82   | MH-H3PO4+3  | 1229.514 | y23-H3PO4+2 |
|         | b6-NH3      | 906.642  | a17-H3PO4+2 |          |             |
|         | b20-H3PO4+3 | 921.344  |             |          |             |
|         | b12-NH3+2   | 947.223  | y18-H2O+2   |          |             |
| 720.034 | b6          |          | y18-NH3+2   |          |             |
| 742.587 | a13+2       | 956.035  | a17+2       |          |             |
|         | y7-NH3      |          | y9-H2O      |          |             |
| 755.497 | b13+2       |          | a9-H3PO4    |          |             |
| 759.424 | y7          |          | y18+2       |          |             |
| 771.38  | b22-H3PO4+3 |          | a8          |          |             |
|         | b14-H3PO4+2 |          | y9-NH3      |          |             |
|         | y15-H2O+2   | 971.205  | b18-H3PO4+2 |          |             |
| 782.437 | y22-H3PO4+3 | 981.917  |             |          |             |
| 789.383 | b7-H3PO4    | 990.764  | y19-H3PO4+2 |          |             |
| 809.344 | y22-H2O+3   | 1030.587 | y19-H2O+2   |          |             |
|         | y22-NH3+3   |          | y19-NH3+2   |          |             |
| 814.855 | y22+3       |          |             |          |             |
| 820.325 | y23-H3PO4+3 |          |             |          |             |
|         | b14+2       |          |             |          |             |
| 839.385 | b15-H2O+2   |          |             |          |             |

### NQIHVKSPPREGS(Phospho)QGELTPANSQSR<sup>+4</sup>

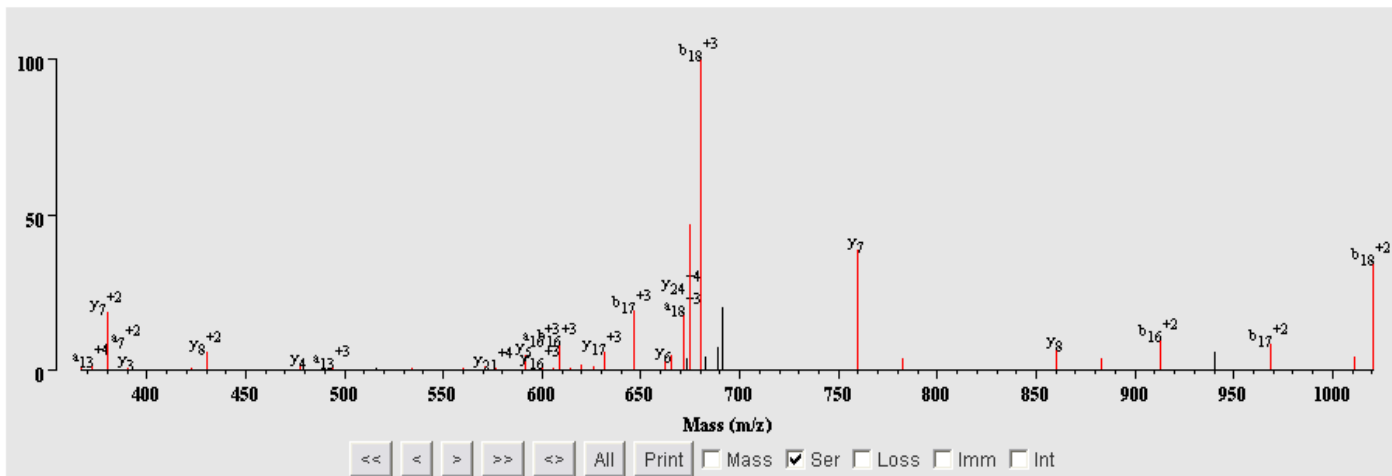

| m/z     | Ion Type    | m/z     | Ion Type    | m/z     | Ion Type     | m/z      | Ion Type               |
|---------|-------------|---------|-------------|---------|--------------|----------|------------------------|
| 366.345 | TPAN-H2O    | 591.337 | y5          | 646.808 | HVKSP        | 860.347  | a24-H2O+3              |
|         | PRE-NH3     |         | a22-H2O+4   |         | b21-NH3+4    |          | a24-NH3+3              |
|         | a13-H2O+4   |         | a22-NH3+4   |         | y21+4        |          | y8                     |
| 371.877 | y7-H2O+2    | 599.894 | TPANSQ      |         | y24-H3PO4+4  | 882.736  | EGS(Phospho)QGELT      |
|         | a10-H2O+3   |         | y17-H3PO4+3 | 662.417 | VKSPPR-H2O   | 913.02   | b16+2                  |
|         | a13+4       |         | y16+3       |         | IHVKSP       |          | HVKSPPRE-H2O           |
|         | a10-NH3+3   |         | a16+3       | 665.378 | a18-H2O+3    | 968.981  | GELTPANSQS-NH3         |
|         | y7-NH3+2    |         | SPPREG-H2O  |         | a18-NH3+3    |          | b17+2                  |
|         | y3-H2O      |         | QIHKV       | 671.334 | GELTPAN-H2O  | 1010.909 | REGS(Phospho)QGELT-28  |
| 380.265 | y7+2        | 605.612 | QIHKV       |         | QIHKVKS-28   |          | b18-H2O+2              |
|         | b10-H2O+3   |         | QIHKV       |         | VKSPPR       |          | b18-NH3+2              |
|         | b10-NH3+3   | 609.033 | QIHKV       |         | a19-H3PO4+3  | 1020.128 | KSPPREGS(Phospho)Q-28  |
| 390.08  | y3          |         | QIHKV       |         | a18+3        |          | b19-H3PO4+2            |
|         | a7+2        |         | QIHKV       |         | y24+4        |          | b18+2                  |
| 422.3   | y8-H2O+2    |         | QIHKV       |         | y24+4        |          | REGS(Phospho)QGELT-H2O |
|         | y8-NH3+2    |         | QIHKV       | 674.427 | b18-H2O+3    |          |                        |
|         | PREG-H2O    |         | QIHKV       |         | b18-NH3+3    |          |                        |
| 430.584 | a8-NH3+2    |         | QIHKV       | 680.413 | b19-H3PO4+3  |          |                        |
|         | y8+2        | 614.419 | QIHKV       |         | QIHKVKS-28   |          |                        |
| 477.294 | y4          |         | QIHKV       |         | VKSPPR       |          |                        |
| 494.147 | ELTPA-H2O   |         | QIHKV       | 759.276 | a21-H2O+3    |          |                        |
|         | a13+3       | 619.868 | QIHKV       |         | a21-NH3+3    |          |                        |
| 533.847 | b15-H3PO4+3 |         | QIHKV       |         | y7           |          |                        |
| 560.283 | b15-H2O+3   |         | QIHKV       |         | IHVKSP       |          |                        |
|         | b15-NH3+3   |         | QIHKV       | 782.377 | y22-H3PO4+3  |          |                        |
| 570.691 | b10-H2O+2   | 631.679 | QIHKV       |         | LTPANSQS-NH3 |          |                        |
|         | b10-NH3+2   |         | QIHKV       |         |              |          |                        |
|         | TPANSQ-28   |         | QIHKV       |         |              |          |                        |
|         | y11-H2O+2   |         | QIHKV       |         |              |          |                        |
|         | a22-H3PO4+4 |         | QIHKV       |         |              |          |                        |
| 576.676 | b16-H3PO4+3 |         | QIHKV       |         |              |          |                        |

G.  $\text{MH}_3^{3+}$  693.3148 (LTQ MSMS)

### SPPREGS(Phospho)QGELTPANSQSR<sup>+3</sup>

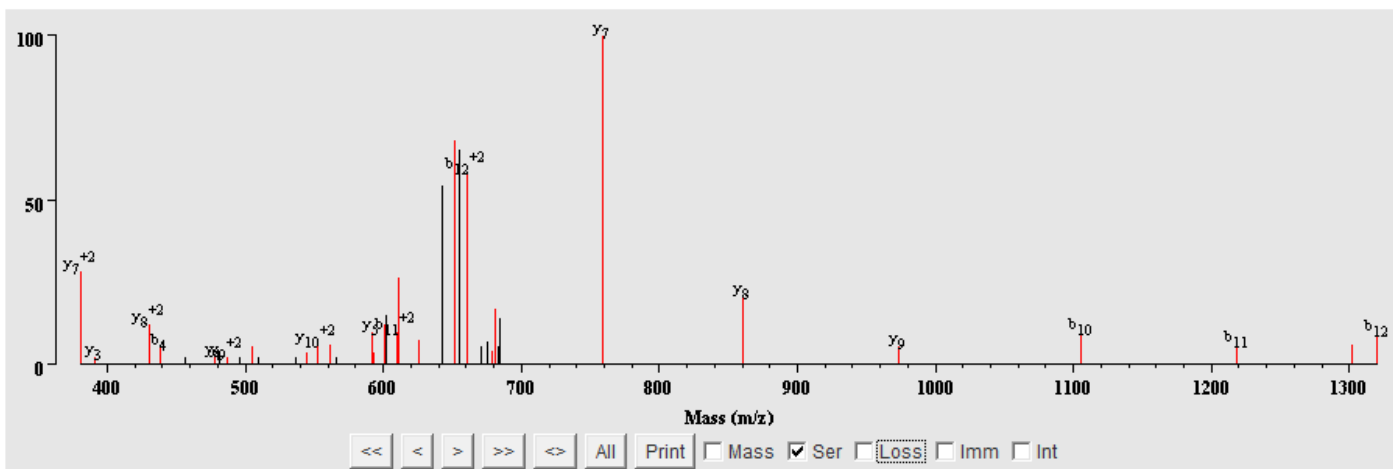

| m/z      | Ion Type               |
|----------|------------------------|
| 380.211  | y7+2                   |
| 390.392  | y3                     |
| 430.841  | y8+2                   |
| 438.329  | b4                     |
| 477.375  | y4                     |
| 487.439  | y9+2                   |
| 504.43   | b10-H3PO4+2            |
| 544.535  | b10-H2O+2<br>b10-NH3+2 |
| 552.007  | y10+2                  |
| 560.974  | b11-H3PO4+2            |
| 591.38   | y5                     |
| 593.362  | y16-H2O+3              |
| 600.717  | b11-H2O+2              |
| 609.791  | b11+2                  |
| 611.152  | b12-H3PO4+2            |
| 626.045  | y17-H2O+3<br>y17-NH3+3 |
| 651.285  | b12-H2O+2<br>b12-NH3+2 |
| 660.538  | b12+2<br>MH-H3PO4+3    |
| 678.772  | y13-H3PO4+2            |
| 681.456  | a14-H3PO4+2            |
| 759.4    | y7                     |
| 860.425  | y8                     |
| 973.401  | y9                     |
| 1105.454 | b10                    |
| 1218.269 | b11                    |
| 1301.526 | b12-H2O                |
| 1319.379 | b12                    |

H.  $\text{MH}_3^{3+}$  693.3160(LTQ MSMS)

### S(Phospho)PPREGSQGELTPANSQSR<sup>+3</sup>

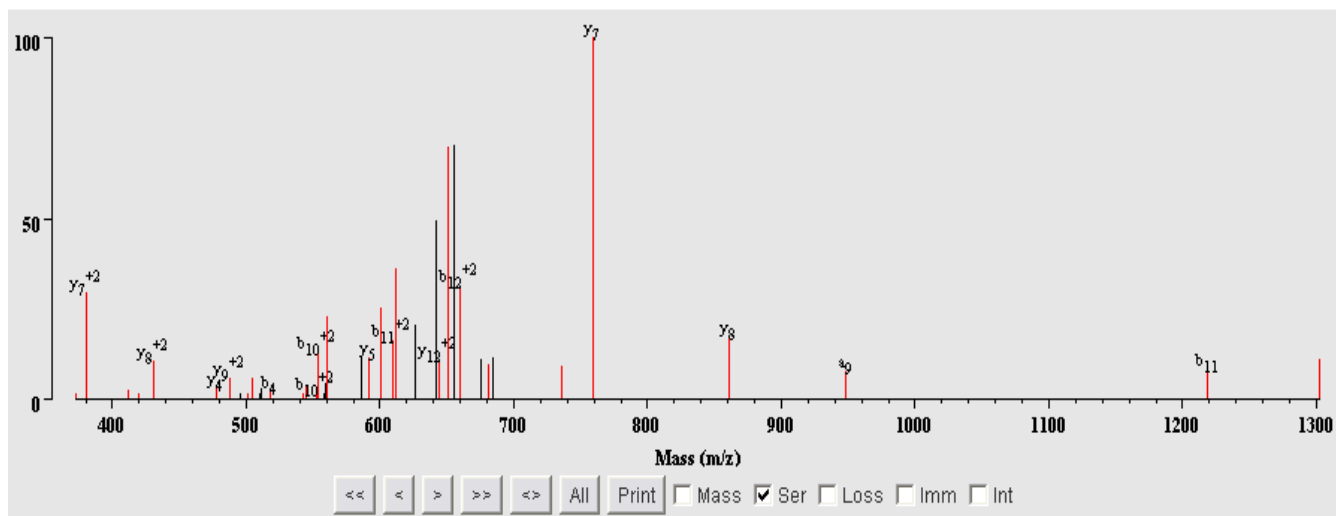

| m/z     | Ion Type    | m/z      | Ion Type    |
|---------|-------------|----------|-------------|
| 372.08  | y7-NH3+2    | 660.279  | b13-H3PO4+2 |
|         | y3-H2O      |          | b12+2       |
| 380.285 | y7+2        |          | MH-H3PO4+3  |
| 411.308 | b8-H3PO4+2  | 681.363  | a14-H3PO4+2 |
| 420.068 | b4-H3PO4    | 735.559  | b14-H2O+2   |
| 430.817 | y8+2        |          | b14-NH3+2   |
| 477.265 | y4          | 759.506  | y7          |
| 487.675 | y9+2        | 860.648  | b17-H3PO4+2 |
| 501.186 | b4-NH3      |          | y8          |
| 504.286 | b10-H3PO4+2 | 947.806  | y18-NH3+2   |
| 517.819 | b4          |          | a9          |
| 542.482 | y10-H2O+2   | 1218.685 | b11         |
|         | y10-NH3+2   | 1301.703 | b12-H2O     |
| 544.537 | b10-H2O+2   |          |             |
|         | b10-NH3+2   |          |             |
| 552.653 | b10+2       |          |             |
| 553.306 | b10+2       |          |             |
| 557.688 |             |          |             |
| 559.605 |             |          |             |
| 560.855 | b11-H3PO4+2 |          |             |
| 591.37  | y5          |          |             |
| 600.955 | b11-H2O+2   |          |             |
|         | b11-NH3+2   |          |             |
| 609.991 | b11+2       |          |             |
| 611.533 | b12-H3PO4+2 |          |             |
| 644.422 | y6-H2O      |          |             |
|         | y12+2       |          |             |
| 651.316 | b12-H2O+2   |          |             |
|         | b12-NH3+2   |          |             |

I.  $MH_2^{2+}$  928.3361(LTQ MSMS)

### SMGSQEDDSGNKPS(Phospho)SYS<sup>+2</sup>

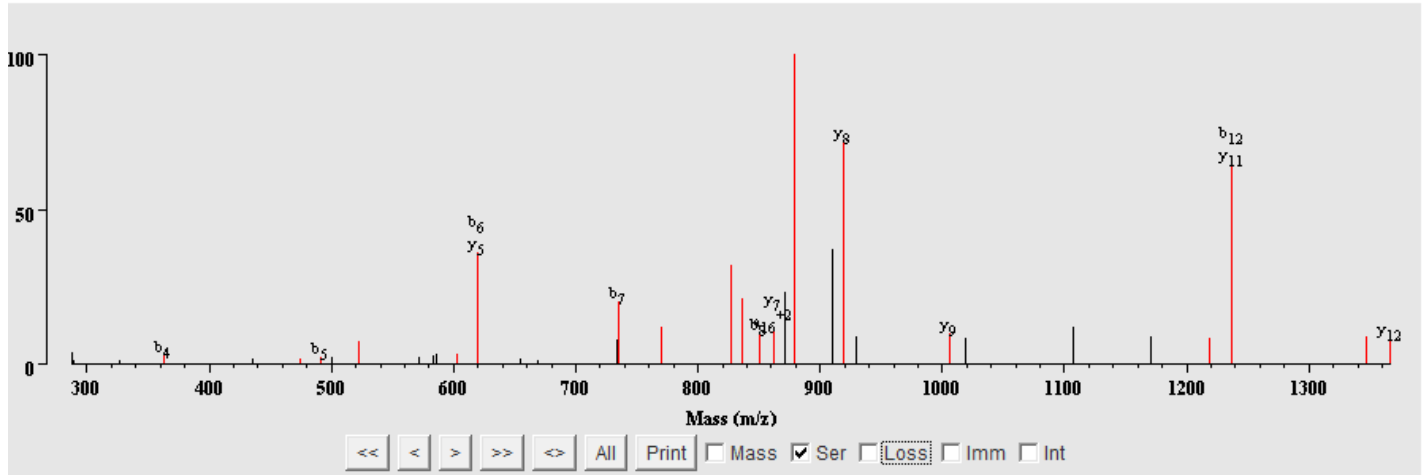

| m/z      | Ion Type    |
|----------|-------------|
| 363.003  | b4          |
| 474.471  | b5-NH3      |
| 491.327  | b5          |
| 522.145  | y5-H3PO4    |
| 602.424  | y5-H2O      |
|          | b6-H2O      |
|          | b6-NH3      |
| 620.221  | y5          |
|          | b6          |
| 735.083  | b7          |
| 770.316  | y15-H3PO4+2 |
| 827.073  | b16-H3PO4+2 |
| 835.897  | y16-H3PO4+2 |
| 850.304  | b8          |
| 862.216  | a16+2       |
|          | y7          |
| 879.29   | MH-H3PO4+2  |
| 919.333  | b9-H2O      |
|          | MH-H2O+2    |
|          | y8          |
|          | MH-NH3+2    |
| 1006.372 | y9          |
| 1218.551 | y11-H2O     |
|          | b12-H2O     |
| 1236.341 | y11         |
|          | b12         |
| 1347.481 | y12-H2O     |
| 1365.795 | y12         |

**KPVAGALDVS(Phospho)FNK<sup>+2</sup>**

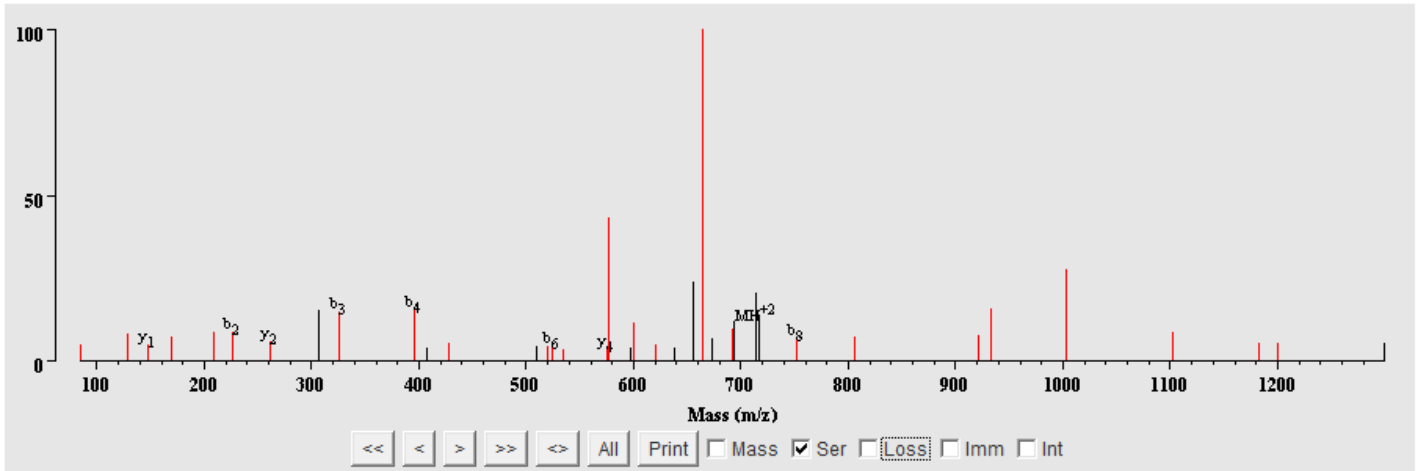

| m/z       | Ion Type          |
|-----------|-------------------|
| 84.0856   | K                 |
| 129.1005  | GA                |
|           | AG                |
|           | K                 |
| 147.1084  | y1                |
| 169.1394  | PV-28             |
| 209.101   | b2-NH3            |
| 226.1669  | b2                |
| 261.1613  | y2                |
| 325.2287  | PVAG              |
|           | b3                |
| 396.2796  | PVAGA             |
|           | b4                |
| 428.3447  | GALDV-28          |
| 520.3711  | a11-H3PO4+2       |
| 524.2754  | b6                |
| 534.3184  | b11-H3PO4+2       |
| 575.2794  | y4                |
| 576.3469  | y5-H3PO4          |
| 600.4085  | y12-H3PO4+2       |
| 620.4748  | b7-NH3            |
| 664.4596  | MH-H3PO4+2        |
| 691.3847  | y6-H3PO4          |
| 713.4734  | ALDVS(Phospho)F   |
|           | MH+2              |
|           | GALDVS(Phospho)F- |
| 752.3213  | H2O               |
|           | b8                |
| 805.5167  | a9-H2O            |
| 920.5723  | b10-H3PO4         |
| 932.6546  | y9-H3PO4          |
| 1003.5808 | y10-H3PO4         |
| 1102.7568 | y11-H3PO4         |
| 1181.8746 | b12-H3PO4         |
| 1199.64   | y12-H3PO4         |



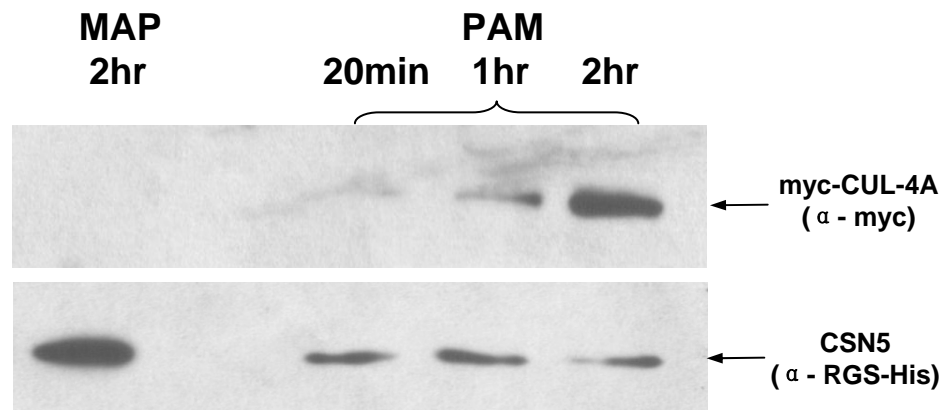

Supplemental Figure 4

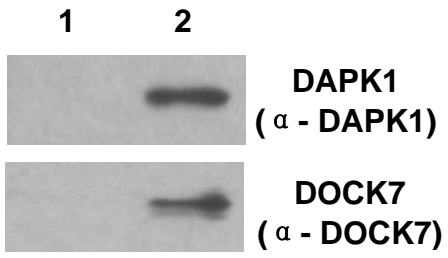

Supplemental Figure 5

Supplemental Table 1. Protein Reports of the Identified CSN Interacting Proteins Using MAP-SILAC  
 MAP-SILAC(1) MAP-SILAC(2)

| Acc #  | Num Uniq | % Cov | Best Disc | Best Expe | Num Uniq | % Cov | Best Disc | Best Expe | Num Uniq |
|--------|----------|-------|-----------|-----------|----------|-------|-----------|-----------|----------|
| P08107 | 36       | 45.7  | 5.78      | 4.20E-10  | 50       | 44.3  | 5.16      | 6.50E-09  | 43       |
| Q96N67 | 60       | 28.8  | 4.86      | 2.20E-08  | 39       | 20.3  | 3.79      | 9.50E-07  | 54       |
| Q4VCS5 | 37       | 32.6  | 4.57      | 7.50E-08  | 37       | 29.3  | 3.63      | 4.00E-06  | 27       |
| Q16531 | 19       | 21.1  | 4.45      | 1.20E-07  | 33       | 25.7  | 4.92      | 5.20E-07  | 8        |
| O43491 | 15       | 15.7  | 4.35      | 1.90E-07  | 39       | 38.1  | 4.09      | 7.80E-07  | 15       |
| P35580 | 15       | 10.4  | 5.33      | 2.90E-09  | 29       | 19.5  | 5.22      | 2.20E-07  | 5        |
| P34931 | 21       | 26.5  | 5.78      | 4.20E-10  | 29       | 27.8  | 5.16      | 6.50E-09  | 24       |
| P11021 | 18       | 27.1  | 4.7       | 4.20E-08  | 33       | 38.4  | 3.7       | 2.10E-06  | 18       |
| Q13620 | 15       | 20.1  | 3.81      | 1.90E-06  | 31       | 35.1  | 3.96      | 1.60E-06  | 9        |
| O75955 | 21       | 43.1  | 4.26      | 2.80E-07  | 6        | 15.9  | 3.35      | 2.50E-06  | 22       |
| P08238 | 31       | 30.8  | 5.85      | 3.10E-10  | 22       | 21.3  | 4.83      | 4.80E-08  | 18       |
| P28289 | 14       | 47.1  | 4.22      | 3.30E-07  | 18       | 55.4  | 3.68      | 2.10E-06  | 21       |
| P35579 | 6        | 3.8   | 2.78      | 5.10E-05  | 21       | 14.5  | 3.9       | 1.10E-06  | 1        |
| Q6WCQ1 | 24       | 24.2  | 4.19      | 3.80E-07  | 10       | 13.3  | 3.23      | 4.60E-06  | 10       |
| O75970 | 23       | 14.6  | 4.41      | 1.50E-07  | 17       | 12.9  | 3.67      | 6.40E-06  | 11       |
| Q13618 | 6        | 13.3  | 3.45      | 8.70E-06  | 15       | 23.7  | 4.78      | 5.50E-08  |          |
| P17066 | 11       | 13.4  | 4.56      | 7.80E-08  | 12       | 11.2  | 4.85      | 2.20E-08  | 13       |
| Q5VUJ6 | 14       | 18.8  | 4.77      | 3.10E-08  | 11       | 17.4  | 3.33      | 3.60E-05  | 8        |
| O15085 | 2        | 2.6   | 3.93      | 1.10E-06  | 12       | 12.2  | 4.71      | 1.00E-07  | 3        |
| P53355 | 15       | 10.7  | 4.44      | 1.30E-07  | 10       | 10.6  | 5.03      | 3.40E-08  | 17       |
| Q8N3R9 | 9        | 18.5  | 4.43      | 1.30E-07  | 16       | 27.6  | 3.21      | 8.30E-06  | 9        |
| P11171 | 13       | 16.4  | 4.44      | 1.30E-07  | 13       | 15.3  | 2.5       | 1.40E-05  | 10       |
| O14974 | 14       | 13.8  | 4.44      | 1.30E-07  | 11       | 12.7  | 4.52      | 1.40E-07  | 9        |
| Q9UJZ1 | 7        | 27    | 4.45      | 1.20E-07  | 2        | 9.3   | 4.11      | 5.10E-07  | 9        |
| Q13617 | 5        | 6.4   | 2.33      | 1.70E-05  | 13       | 17.6  | 3.58      | 1.00E-05  |          |
| Q92466 | 4        | 8.7   | 1.55      | 2.40E-04  | 9        | 28.1  | 4.69      | 7.80E-09  | 3        |
| Q13616 | 1        | 2.4   | 1.87      | 1.40E-04  | 11       | 18.3  | 3.99      | 3.80E-06  |          |
| P25705 | 12       | 23    | 4.72      | 3.90E-08  | 8        | 19.5  | 4.43      | 1.30E-07  | 9        |
| P13639 | 5        | 6.9   | 3.86      | 1.60E-06  | 3        | 4.8   | 3.12      | 3.50E-05  | 11       |
| Q9Y2D5 | 11       | 12.6  | 4.54      | 8.30E-08  | 5        | 10.8  | 3.44      | 6.10E-07  | 6        |
| Q13619 | 9        | 12.3  | 2.5       | 2.60E-05  | 8        | 10.7  | 2.82      | 9.80E-06  | 4        |
| Q9P0K7 | 10       | 11.1  | 4.86      | 2.20E-08  | 4        | 4.8   | 2.21      | 1.20E-04  | 4        |
| Q9NZQ3 | 11       | 15.7  | 3.72      | 2.70E-06  | 7        | 8.9   | 3.41      | 3.70E-06  | 9        |
| P48741 | 7        | 14.2  | 4.55      | 7.90E-08  | 7        | 10.9  | 4.5       | 2.20E-08  | 8        |
| P60660 | 6        | 35.1  | 4.02      | 7.70E-07  | 12       | 48.3  | 2.91      | 7.30E-06  | 6        |
| Q9P2K6 | 2        | 7.7   | 3.06      | 2.00E-05  | 7        | 20    | 4.06      | 6.10E-07  | 2        |
| Q9UDY2 | 7        | 8.2   | 3.86      | 1.50E-06  | 3        | 4.3   | 2.01      | 3.70E-04  | 9        |
| O75477 | 7        | 14.7  | 3.66      | 3.70E-06  | 2        | 7.5   | 1.88      | 1.40E-04  | 8        |
| Q8NI35 | 5        | 3.1   | 5.37      | 2.50E-09  | 5        | 3.9   | 3.54      | 1.10E-05  | 7        |
| P04843 | 7        | 10.7  | 4.22      | 3.30E-07  | 2        | 4     | 0.41      | 0.005     | 6        |
| Q9Y4B6 | 4        | 3.1   | 2.6       | 7.50E-05  | 6        | 5.6   | 3.85      | 5.40E-06  | 5        |
| Q14651 | 6        | 4.1   | 3.3       | 1.70E-05  | 5        | 5.6   | 2.88      | 6.30E-05  | 6        |
| P80723 | 5        | 48    | 2.94      | 3.60E-05  | 6        | 57.3  | 3.17      | 2.10E-05  | 5        |
| Q14315 | 5        | 1.7   | 2.82      | 1.20E-05  | 7        | 3.7   | 3.03      | 3.90E-06  | 7        |
| Q8IY63 | 6        | 7.6   | 3.48      | 7.70E-06  | 6        | 7.1   | 2.23      | 1.00E-04  | 4        |
| Q13561 | 5        | 10.7  | 3.74      | 2.60E-06  | 5        | 15.5  | 3.02      | 9.70E-06  |          |
| P62877 | 3        | 18.5  | 4.15      | 4.40E-07  | 7        | 18.5  | 2.37      | 1.40E-05  | 2        |
| Q6PJ61 | 4        | 13    | 2.71      | 1.30E-05  | 1        | 4.5   | 2.78      | 3.90E-05  | 3        |

|        |   |      |      |          |   |      |      |          |   |
|--------|---|------|------|----------|---|------|------|----------|---|
| P36957 | 2 | 6    | 3.46 | 8.50E-06 | 2 | 3.1  | 3.86 | 2.00E-06 | 1 |
| Q9NUP9 | 2 | 14.2 | 4.24 | 3.10E-07 | 1 | 8.1  | 1.65 | 3.80E-04 | 2 |
| P63167 | 2 | 12.4 | 3.55 | 5.70E-06 | 3 | 20.2 | 2.25 | 2.20E-05 | 1 |
| Q9NNW5 | 3 | 5.2  | 0.85 | 5.90E-04 |   |      |      |          | 2 |

C and PAM-SILAC Approaches

| PAM-SILAC(1) |           |           | PAM-SILAC(2) |       |           | Protein MV | Species  | Protein Na |                    |
|--------------|-----------|-----------|--------------|-------|-----------|------------|----------|------------|--------------------|
| % Cov        | Best Disc | Best Expe | Num Uniq     | % Cov | Best Disc |            |          |            | Best Expe          |
| 36.7         | 5.28      | 3.90E-09  | 33           | 34.6  | 4.41      | 1.50E-07   | 70052.8  | HUMAN      | Heat shock         |
| 21.2         | 4.88      | 8.50E-10  | 26           | 11.1  | 4.42      | 1.40E-07   | 242562.8 | HUMAN      | Dedicator c        |
| 25.1         | 3.62      | 4.30E-06  | 40           | 36.5  | 4.39      | 1.40E-07   | 118086.4 | HUMAN      | Angiomotir         |
| 10.4         | 4.94      | 1.40E-08  | 13           | 12.9  | 3.63      | 4.10E-06   | 126969   | HUMAN      | DNA dama           |
| 16.7         | 3.76      | 2.30E-07  | 23           | 22.9  | 3.71      | 3.00E-06   | 112589   | HUMAN      | Band 4.1-li        |
| 3.5          | 2.11      | 1.40E-05  | 2            | 1.2   | 2.7       | 1.40E-04   | 228941   | HUMAN      | Myosin-10          |
| 22.8         | 4.91      | 3.90E-09  | 18           | 18.1  | 4.3       | 2.30E-07   | 70375.6  | HUMAN      | Heat shock         |
| 26.3         | 4.33      | 1.30E-07  | 15           | 17    | 3.89      | 1.40E-06   | 72333.5  | HUMAN      | 78 kDa glu         |
| 7.5          | 2.82      | 1.50E-05  | 13           | 14.5  | 3.62      | 4.20E-06   | 102300   | HUMAN      | Cullin-4B -        |
| 42.6         | 5.55      | 2.20E-09  | 3            | 9.8   | 3.18      | 2.80E-05   | 47355.7  | HUMAN      | Flotillin-1 -      |
| 22.1         | 4.24      | 5.70E-08  | 4            | 5.5   | 3.69      | 2.40E-06   | 83264.9  | HUMAN      | Heat shock         |
| 46.5         | 4.2       | 1.50E-07  | 12           | 39.6  | 3         | 6.10E-05   | 40569.5  | HUMAN      | Tropomodt          |
| 0.6          | 1.77      | 9.60E-05  | 2            | 1.1   | 1.61      | 9.20E-04   | 226534.2 | HUMAN      | Myosin-9 -         |
| 12.3         | 2.65      | 2.90E-06  | 4            | 5     | 2.17      | 1.60E-04   | 116447.1 | HUMAN      | Myosin phc         |
| 6.2          | 4.15      | 1.00E-06  | 8            | 4.4   | 2.7       | 1.70E-05   | 218598.4 | HUMAN      | Multiple PI        |
|              |           |           | 3            | 4.4   | 3.47      | 8.00E-06   | 88931    | HUMAN      | Cullin-3 - F       |
| 14.2         | 4.77      | 6.80E-09  | 9            | 10    | 4.3       | 2.30E-07   | 71028.7  | HUMAN      | Heat shock         |
| 12.8         | 4.8       | 1.50E-07  | 10           | 13.5  | 3.09      | 4.00E-05   | 84589.1  | HUMAN      | Leucine-ric        |
| 2.9          | 4.67      | 8.60E-09  | 2            | 2.2   | 1.39      | 0.001      | 167705.9 | HUMAN      | Rho guanir         |
| 9.8          | 3.6       | 1.90E-07  | 7            | 6.2   | 3.88      | 1.40E-06   | 160287.8 | HUMAN      | Death-assc         |
| 17.5         | 4.04      | 1.20E-08  | 7            | 11.4  | 4.32      | 2.10E-07   | 77294.2  | HUMAN      | MAGUK p $\epsilon$ |
| 13.3         | 5.03      | 6.30E-08  | 3            | 3.1   | 2.6       | 3.30E-04   | 97017.7  | HUMAN      | Protein 4.1        |
| 7.4          | 3.34      | 5.30E-07  | 3            | 3.2   | 2.88      | 1.00E-04   | 115281.6 | HUMAN      | Protein phc        |
| 29.8         | 4.99      | 2.70E-08  | 1            | 4.5   | 1.28      | 1.80E-04   | 38534.4  | HUMAN      | Stomatin-li        |
|              |           |           | 3            | 4     | 3.67      | 3.10E-06   | 86983.9  | HUMAN      | Cullin-2 - F       |
| 7.3          | 2         | 4.90E-05  | 4            | 9.8   | 2.68      | 7.10E-06   | 47864.4  | HUMAN      | DNA dama           |
|              |           |           | 1            | 1.3   | 2.96      | 2.90E-06   | 89679.3  | HUMAN      | Cullin-1 - F       |
| 15.6         | 3.06      | 1.40E-06  | 4            | 6.1   | 2.95      | 3.80E-05   | 59751.1  | HUMAN      | ATP syntha         |
| 12.9         | 4.05      | 5.60E-07  |              |       |           |            | 95339    | HUMAN      | Elongation         |
| 10.7         | 2.22      | 3.20E-06  | 3            | 3.7   | 3.52      | 6.40E-06   | 96102    | HUMAN      | A-kinase a         |
| 4.5          | 2.6       | 5.70E-05  | 2            | 3.2   | 2.49      | 5.40E-04   | 87681    | HUMAN      | Cullin-4A -        |
| 5.2          | 2.36      | 1.50E-05  | 2            | 2.2   | 1.52      | 7.30E-04   | 110042.2 | HUMAN      | Ankycorbir         |
| 13.2         | 3.11      | 1.60E-05  | 9            | 9.3   | 2.63      | 2.90E-04   | 78960.9  | HUMAN      | SH3 adapt          |
| 13.1         | 4.43      | 6.80E-09  | 8            | 13.1  | 4.3       | 2.30E-07   | 40244.8  | HUMAN      | Putative he        |
| 29.1         | 3.57      | 1.80E-07  | 2            | 8.6   | 3.31      | 5.30E-06   | 16930.2  | HUMAN      | Myosin ligh        |
| 2.2          | 0.79      | 4.80E-04  | 3            | 11.1  | 3.62      | 4.20E-06   | 56868.3  | HUMAN      | Kelch dom          |
| 7.4          | 3.48      | 3.40E-07  | 5            | 6.7   | 2.93      | 8.20E-05   | 133973.1 | HUMAN      | Tight juncti       |
| 13.6         | 3.6       | 1.90E-07  | 1            | 3.5   | 1.7       | 2.00E-04   | 38926.2  | HUMAN      | Erlin-1 pre        |
| 4.1          | 3.82      | 4.00E-07  | 2            | 2.1   | 1.46      | 2.10E-04   | 196369.7 | HUMAN      | InaD-like p        |
| 9.2          | 4.11      | 2.10E-07  |              |       |           |            | 68570    | HUMAN      | Dolichyl-dij       |
| 4.2          | 2.94      | 7.80E-07  | 5            | 4.5   | 2.38      | 9.40E-05   | 169008.7 | HUMAN      | Protein VP         |
| 7            | 3.28      | 7.70E-07  | 4            | 4.1   | 3.78      | 2.20E-06   | 70353.2  | HUMAN      | Plastin-1 -        |
| 51.1         | 4.35      | 2.80E-08  | 5            | 35.7  | 1.66      | 3.30E-04   | 22693.6  | HUMAN      | Brain acid         |
| 2.5          | 2.98      | 8.40E-08  | 4            | 1.3   | 2.35      | 1.30E-04   | 290961.6 | HUMAN      | Filamin-C -        |
| 4.9          | 2.11      | 2.10E-05  | 2            | 1     | 2.43      | 7.50E-05   | 106575.1 | HUMAN      | Angiomotir         |
|              |           |           | 4            | 10.5  | 2.98      | 2.20E-06   | 44231.4  | HUMAN      | Dynactin s         |
| 18.5         | 1.48      | 6.90E-05  | 6            | 18.5  | 2.29      | 5.20E-06   | 12274.1  | HUMAN      | RING-box           |
| 7.9          | 5.44      | 3.00E-09  | 3            | 8.8   | 3.38      | 1.20E-05   | 69031.4  | HUMAN      | F-box only         |

|      |      |          |   |      |      |          |          |       |             |
|------|------|----------|---|------|------|----------|----------|-------|-------------|
| 2    | 0.88 | 3.30E-04 | 3 | 6    | 1.88 | 1.50E-04 | 48640.6  | HUMAN | Dihydrolipe |
| 14.2 | 0.26 | 0.0063   | 4 | 20.8 | 2.36 | 5.50E-04 | 21834.2  | HUMAN | Lin-7 homc  |
| 12.4 | 2.35 | 2.30E-05 | 2 | 12.4 | 3.12 | 3.60E-05 | 10366    | HUMAN | Dynein ligh |
| 5.7  | 2.9  | 2.50E-06 |   |      |      |          | 121725.7 | HUMAN | WD repeat   |

me

< 70 kDa protein 1 - Homo sapiens (Human)  
of cytokinesis protein 7 - Homo sapiens (Human)  
1 - Homo sapiens (Human)  
ige-binding protein 1 - Homo sapiens (Human)  
ke protein 2 - Homo sapiens (Human)  
- Homo sapiens (Human)  
< 70 kDa protein 1L - Homo sapiens (Human)  
cose-regulated protein precursor - Homo sapiens (Human)  
Homo sapiens (Human)  
Homo sapiens (Human)  
< protein HSP 90-beta - Homo sapiens (Human)  
ulin-1 - Homo sapiens (Human)  
Homo sapiens (Human)  
osphatase Rho-interacting protein - Homo sapiens (Human)  
Z domain protein - Homo sapiens (Human)  
Homo sapiens (Human)  
< 70 kDa protein 6 - Homo sapiens (Human)  
h repeat and calponin homology domain-containing protein 2 - Homo sapiens (Human)  
e nucleotide exchange factor 11 - Homo sapiens (Human)  
ociated protein kinase 1 - Homo sapiens (Human)  
55 subfamily member 5 - Homo sapiens (Human)  
- Homo sapiens (Human)  
osphatase 1 regulatory subunit 12A - Homo sapiens (Human)  
ke protein 2 - Homo sapiens (Human)  
Homo sapiens (Human)  
ige-binding protein 2 - Homo sapiens (Human)  
Homo sapiens (Human)  
ase subunit alpha, mitochondrial precursor - Homo sapiens (Human)  
factor 2 - Homo sapiens (Human)  
nchor protein 2 - Homo sapiens (Human)  
Homo sapiens (Human)  
1 - Homo sapiens (Human)  
er protein SPIN90 - Homo sapiens (Human)  
at shock 70 kDa protein 7 - Homo sapiens (Human)  
t polypeptide 6 - Homo sapiens (Human)  
ain-containing protein 5 - Homo sapiens (Human)  
ion protein ZO-2 - Homo sapiens (Human)  
ursor - Homo sapiens (Human)  
rotein - Homo sapiens (Human)  
phosphooligosaccharide--protein glycosyltransferase 67 kDa subunit precursor - Homo sapiens (Human)  
RBP - Homo sapiens (Human)  
Homo sapiens (Human)  
soluble protein 1 - Homo sapiens (Human)  
- Homo sapiens (Human)  
1-like protein 1 - Homo sapiens (Human)  
ubunit 2 - Homo sapiens (Human)  
protein 1 - Homo sapiens (Human)  
protein 46 - Homo sapiens (Human)

γ-lysine-residue succinyltransferase component of 2-oxoglutarate dehydrogenase complex, mitochondrial precursor C - Homo sapiens (Human)  
subunit chain 1, cytoplasmic - Homo sapiens (Human)  
mitochondrial 2-oxoglutarate dehydrogenase complex-containing protein 6 - Homo sapiens (Human)





ursor - Homo sapiens (Human)

## Supplemental Table 2. Quantification of Putative PIPs Using MAP-SILAC and Tc-PAM-SILAC Approaches

### A. Stable Interactors\*

| Acc    | MAP-SILAC(1) |      |     | PAM-SILAC(1) |      |     | MAP-SILAC(2) |      |     |
|--------|--------------|------|-----|--------------|------|-----|--------------|------|-----|
|        | n            | avg  | std | n            | avg  | std | n            | avg  | std |
| Q4VCS5 | 36           | high | n/a | 38           | high | n/a | 26           | high | n/a |
| Q9Y4B6 | 4            | high | n/a | 4            | high | n/a | 2            | high | -   |
| P80723 | 3            | 9.4  | 2.2 | -            | -    | -   | 3            | 6.9  | 1.6 |
| Q8IY63 | 5            | 7.2  | 1.8 | 2            | 4.3  | 0.5 | 3            | 6.6  | 1.4 |
| P28289 | 11           | 5.7  | 1.5 | 16           | 4.0  | 0.7 | 8            | 6.0  | 1.1 |
| P63167 | 2            | 4.7  | 0.7 | 1            | 4.2  | -   | 3            | 3.2  | 0.4 |
| Q9UJZ1 | 6            | 3.9  | 1   | 9            | 2.3  | 0.3 | 2            | 3.7  | 0.3 |
| Q96N67 | 52           | 3.9  | 0.9 | 48           | 2.5  | 0.3 | 14           | 2.7  | 0.5 |
| O75955 | 17           | 2.7  | 0.5 | 21           | 2.0  | 0.4 | 4            | 2.8  | 0.7 |
| O43491 | 13           | 3.0  | 0.8 | 13           | 2.7  | 0.6 | 15           | 2.2  | 0.9 |
| P48741 | 4            | 2.9  | 0.6 | 6            | 1.7  | 0.1 | 6            | 2.7  | 0.6 |
| Q9NZQ3 | 9            | 2.9  | 0.8 | 9            | 3.4  | 0.7 | 2            | 3.0  | 0.7 |
| P34931 | 16           | 2.6  | 0.6 | 18           | 2.2  | 0.5 | 27           | 2.5  | 0.6 |
| P25705 | 7            | 2.5  | 0.5 | 6            | 1.8  | 0.3 | 5            | 1.6  | 0.1 |
| P08107 | 33           | 2.5  | 0.7 | 42           | 2.0  | 0.4 | 47           | 2.8  | 0.4 |
| P17066 | 9            | 2.5  | 0.7 | 10           | 1.8  | 0.3 | 7            | 2.8  | 0.6 |
| P35579 | 6            | 2.3  | 0.3 | 1            | 2.5  | -   | 15           | 2.2  | 0.6 |
| Q9NNW5 | 3            | high | n/a | 2            | high | n/a | -            | -    | -   |
| P11021 | 13           | 2.1  | 0.5 | 8            | 1.7  | 0.2 | 17           | 1.6  | 0.4 |
| P08238 | 17           | 2.0  | 0.4 | 11           | 1.8  | 0.2 | 21           | 2.1  | 0.5 |

### B. Putative CSN Interacting Proteins\*\*

| Acc    | MAP-SILAC(1) |     |     | PAM-SILAC(1) |     |     | MAP-SILAC(2) |     |     | P/ |
|--------|--------------|-----|-----|--------------|-----|-----|--------------|-----|-----|----|
|        | n            | avg | std | n            | avg | std | n            | avg | std |    |
| O75477 | 7            | 2.5 | 0.9 | 8            | 1.4 | 0.1 | -            | -   | -   |    |
| Q13561 | 2            | 2.4 | 0.5 | 3            | 1.3 | 0.2 | 5            | 2.0 | 0.6 |    |
| P60660 | 4            | 2.2 | 0.3 | 6            | 1.4 | 0.1 | 2            | 2.8 | 0.2 |    |
| P36957 | 2            | 2.1 | 0.3 | 1            | 1.5 | -   | 4            | 1.6 | 0.2 |    |
| Q6WCQ1 | 16           | 2.0 | 0.4 | 8            | 1.3 | 0.2 | 9            | 1.7 | 0.5 |    |
| P13639 | 3            | 2.0 | 0.4 | -            | -   | -   | -            | -   | -   |    |
| P11171 | 5            | 1.9 | 0.6 | 7            | 1.1 | 0.1 | 2            | 1.8 | 0.1 |    |
| Q14651 | 6            | 1.8 | 0.3 | 6            | 1.3 | 0.2 | 5            | 1.9 | 0.3 |    |
| Q9P0K7 | 10           | 1.7 | 0.5 | 4            | 1.0 | 0.2 | 3            | 1.7 | 0.3 |    |
| Q14315 | 5            | 1.7 | 0.2 | 7            | 0.9 | 0.1 | 3            | 1.9 | 0.2 |    |
| Q9UDY2 | 2            | 1.7 | 0.2 | 2            | 1.0 | 0.0 | 2            | 1.8 | 0.3 |    |
| P04843 | 6            | 1.7 | 0.3 | 6            | 1.1 | 0.1 | -            | -   | -   |    |

#### Note:

\*Stable interactors are the ones with similar MAP-SILAC and PAM-SILAC ratios (< 2 fold difference).

\*\*These proteins have MAP-SILAC ratios >1.5, whereas their PAM-SILAC ratios =<1.5 or not determined.

MAP-SILAC ratios are higher than PAM-SILAC ratios but less than 2-fold increase.

n: number of unique peptides used for quantitation; avg: average value of SILAC ratios (L/H), high SILAC ratios that the heavy labeled peaks of the peptide pairs were not detected; std: standard deviation of SILAC ratios in e

35

| PAM-SILAC(2) |      |     |                                                                   |
|--------------|------|-----|-------------------------------------------------------------------|
| n            | avg  | std | Protein Name                                                      |
| 22           | high | n/a | Angiomotin                                                        |
| -            | -    | -   | Protein VPRBP                                                     |
| 4            | 4.8  | 0.7 | Brain acid soluble protein 1                                      |
| 1            | 4.5  | -   | Angiomotin-like protein 1                                         |
| 10           | 3.5  | 0.6 | Tropomodulin-1                                                    |
| 3            | 2.2  | 0.2 | Dynein light chain 1, cytoplasmic                                 |
| 1            | 3.1  | -   | Stomatin-like protein 2                                           |
| 3            | 1.7  | 0.4 | Dedicator of cytokinesis protein 7                                |
| 1            | 1.7  | -   | Flotillin-1                                                       |
| 17           | 1.8  | 0.3 | Band 4.1-like protein 2                                           |
| 7            | 2.2  | 0.4 | Putative heat shock 70 kDa protein 7                              |
| 2            | 1.8  | 0.1 | SH3 adapter protein SPIN90                                        |
| 16           | 2.0  | 0.5 | Heat shock 70 kDa protein 1L                                      |
| 4            | 1.6  | 0.3 | ATP synthase subunit alpha, mitochondrial precursor               |
| 32           | 2.3  | 0.4 | Heat shock 70 kDa protein 1                                       |
| 10           | 2.2  | 0.7 | Heat shock 70 kDa protein 6                                       |
| 1            | 1.6  | -   | Myosin-9                                                          |
| -            | -    | -   | WD repeat-containing protein 6                                    |
| 14           | 1.7  | 0.3 | 78 kDa glucose-regulated protein precursor - Homo sapiens (Human) |
| 4            | 1.8  | 0.2 | Heat shock protein HSP 90-beta - Homo sapiens (Human)             |

| AM-SILAC(2) |     |     |                                                                                                                          |
|-------------|-----|-----|--------------------------------------------------------------------------------------------------------------------------|
| n           | avg | std | protein name                                                                                                             |
| -           | -   | -   | Erlin-1 precursor - Homo sapiens (Human)                                                                                 |
| 1           | 1.3 | -   | Dynactin subunit 2 - Homo sapiens (Human)                                                                                |
| 2           | 1.5 | 0.3 | Myosin light polypeptide 6 - Homo sapiens (Human)                                                                        |
| 3           | 1.2 | 0.1 | Dihydrolipoyllysine-residue succinyltransferase component of 2-oxoglutarate dehydrogenase complex - Homo sapiens (Human) |
| 5           | 0.9 | 0.1 | Myosin phosphatase Rho-interacting protein - Homo sapiens (Human)                                                        |
| -           | -   | -   | Elongation factor 2                                                                                                      |
| 2           | 0.9 | 0.1 | Protein 4.1 - Homo sapiens (Human)                                                                                       |
| 4           | 1.2 | 0.2 | Plastin-1 - Homo sapiens (Human)                                                                                         |
| 2           | 1.0 | 0.1 | Ankyrin-1 - Homo sapiens (Human)                                                                                         |
| 2           | 1.0 | 0.1 | Filamin-C - Homo sapiens (Human)                                                                                         |
| 3           | 0.9 | 0.1 | Tight junction protein ZO-2 - Homo sapiens (Human)                                                                       |
| -           | -   | -   | Dolichyl-diphosphooligosaccharide--protein glycosyltransferase 67 kDa subunit precursor - Homo sapiens (Human)           |

; indicate  
each experiment.

ase complex, mitochondrial precursor - Homo sapiens (Human)

or - Homo sapiens (Human)
